# Supplementary material for: SMRT and Illumina RNA sequencing reveal novel insights into the heat stress response and crosstalk with leaf senescence in tall fescue
Source: Springer Nature journal article supplement (doi:10.1186/s12870-020-02572-4), 2020-08-03
Supplement: MOESM10 [file 12870_2020_2572_MOESM10_ESM.pdf]

(a)

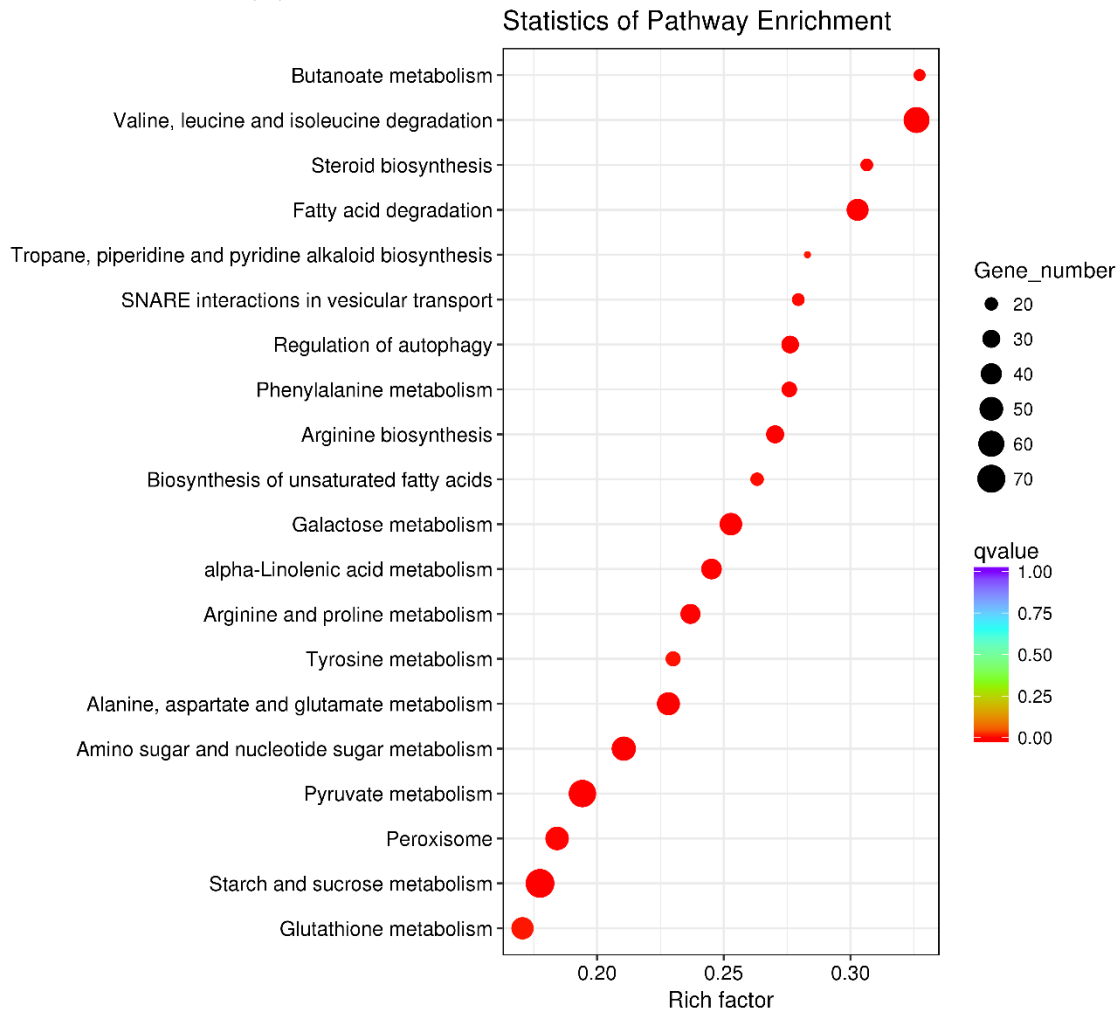

(b)

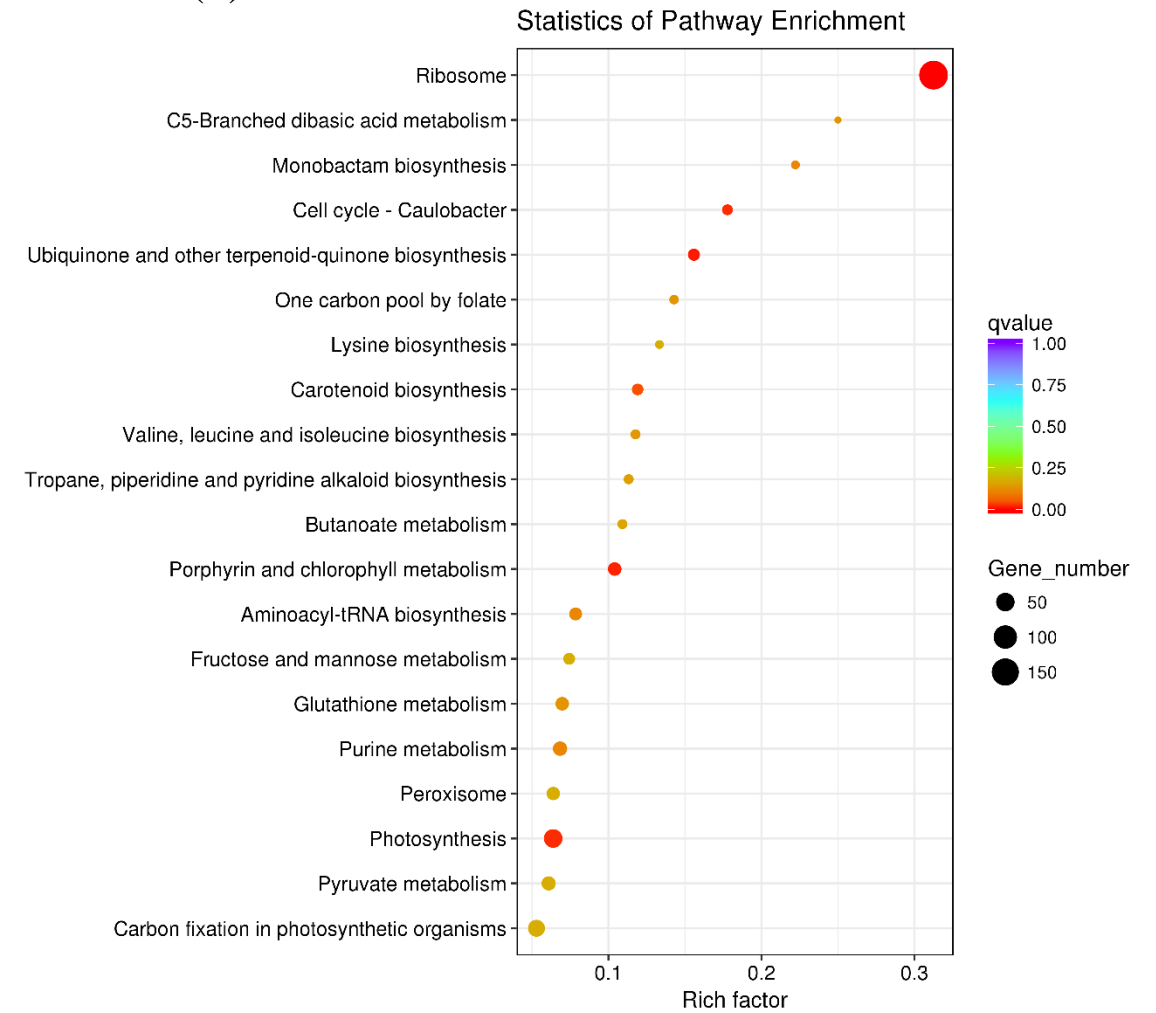

**Additional file 10: KEGG analysis of DEGs specifically regulated by natural senescence.** (a) The top 20 KEGG pathways of genes specifically up-regulated by Sen. (b) The top 20 KEGG pathways of genes specifically down-regulated by Sen.
